# Supplementary material
Source: Frontiers journal article supplement (https://www.frontiersin.org/articles/304641)
Supplement: Appendix.pdf [file Appendix.pdf]

## Appendix A

The tariff points for a unit or course are currently calculated as follows:

$$\text{Tariff points} = (\text{CP} * \text{multiplier}) + ((\text{CP} * (\text{course wt} + \text{result wt})) / \text{NCC})$$

Where:

- CP = Scottish Credit and Qualifications Framework (SCQF) credit points
- Multiplier. This is the multiplier for the SCQF level.
- Course wt = Course weight. This is the weight for attaining the full course at that SCQF level (0 for a single unit or combination of units making up an ungraded course, or a variable weight if a course assessment element is involved i.e. added value unit at National 4 or course assessment at National 5 and above).
- Result wt = Result weight. This is the weight which differentiates between the grade achieved (A, B, C, D) for the course at the SCQF level. The weight is such that a grade D receives more points than units alone, recognising that a learner has achieved the course.
- NCC = National course correction. This is the SCQF credit points for the SQA National Course at the same level (with the exception of the BAC IP)

Available at: <http://insight-guides.scotxed.net/support/InsightTariff.pdf>
